# Dosimetric comparisons of VMAT, IMRT and 3DCRT for locally advanced rectal cancer with simultaneous integrated boost

Jun Zhao<sup>1,\*</sup>, Weigang Hu<sup>1,\*</sup>, Gang Cai<sup>1</sup>, Jiazhou Wang<sup>1</sup>, Jiang Xie<sup>1</sup>, Jiayuan Peng<sup>1</sup>, Zhen Zhang<sup>1</sup>

<sup>1</sup>Department of Radiation Oncology, Fudan University Shanghai Cancer Center and Department of Oncology, Shanghai Medical College, Fudan University, Shanghai 200032, China

\*These authors contributed equally to this work

**Correspondence to:** Zhen Zhang, e-mail: zhenzhang6@gmail.com

**Keywords:** rectal radiotherapy, VMAT, dose comparison

**Received:** July 19, 2015

**Accepted:** November 15, 2015

**Published:** November 26, 2015

## ABSTRACT

The simultaneous integrated boost radiotherapy for preoperative locally advanced rectal cancer (LARC) can improve the local control and overall survival rates. The purpose of this study is to compare the dosimetric differences among volumetric modulated arc therapy (VMAT), fixed-field intensity modulated radiotherapy (IMRT) and three-dimensional conformal radiotherapy (3DCRT) for the LARC. Ten LARC patients treated in our department using the simultaneous escalate strategy were retrospectively analyzed in this study. All patients had T3 with N+/- and were treated with IMRT. Two additional VMAT and 3DCRT plans were created for each patient. VMAT plans were designed using SmartArc planning module. Both IMRT and SmartArc had similar optimization objectives. The prescription was 50 Gy to the planning clinical target volume (PTV-C) and 56 Gy to the planning gross target volume (PTV-G). The target coverage and organs at risk (OARs) were compared for all the techniques. The paired, two-tailed Wilcoxon signed-rank test was applied for statistical analysis. Results of this study indicate that IMRT and SmartArc were all significantly superior to 3DCRT in most of the relevant values evaluated of target response, OARs and normal tissue sparing. They provided comparable dosimetric parameters for target volume. But IMRT shows better sparing for OARs and normal tissue.

## INTRODUCTION

Locally advanced rectal cancer (LARC) is a common oncological diagnosis in our country and preoperative radiochemotherapy is the standard neoadjuvant treatment. Previous studies have shown that the preoperative radiochemotherapy provided significantly lower local recurrence rate and less acute and chronic toxicity as compared to postoperative radiochemotherapy [1–7]. A preoperative therapy trial published recently has revealed a significant 5-year disease-free survival rate improvement [8]. However, the acute and chronic small bowel and rectal toxicities are common causes of morbidity during radiochemotherapy for rectal cancer [9]. The severe toxicity may limit the further dose escalation or lead to prolonged treatment interruptions or premature termination of the radiation course, which may reduce the therapy effectiveness.

Several groups have studied the dose-volume relationship between the amount of small bowel receiving intermediate- and low-doses of radiation and the rates of severe diarrhea [10–13]. They found that a strong dose-volume relationship existed for the development of Grade 3 acute small bowel toxicity in patients receiving preoperative radiochemotherapy. Therefore, there has been great interest in the application of highly conformal treatment approaches, such as IMRT and VMAT, for producing highly conformal dose distributions in the target volumes and minimizing the dose to OARs. Several planning studies have done for the LARC by using different treatment approaches, such as proton therapy, VMAT, IMRT and 3DCRT [14–18]. However, only few studied the dosimetric difference among these techniques in the treatment of simultaneous integrated boost radiotherapy for preoperative locally advanced rectal cancer [19]. In ref. [19], the results show that VMAT

plans can provide similar sparing of OARs to IMRT and have higher efficiency. However, according to our clinical experience, IMRT plans can achieve better sparing of OARs with similar target coverage when compared to VMAT plans.

The purpose of this study is to compare the OARs sparing without compromising the target coverage among VMAT, IMRT and 3DCRT plans in 10 patients. Target coverage and target dose distribution, conformality, normal tissue avoidance, and irradiated body volume were evaluated and compared for different plans.

## RESULTS

The dose distributions for the three different treatment plans including 3DCRT, IMRT and SmartArc in the axial slices of two patients were shown in Figure 1. The isodoses were set from 15–55 Gy. The PTV-C was outlined as a green area in all images and the PTV-G was shown as the blue area. The average cumulative DVHs of the ten patients for the PTV-C, the PTV-G, the OARs (bladder, small bowel and femoral heads) and normal tissues were calculated and plotted in Figure 2. The statistical dosimetric evaluation and comparison of the three planning techniques were listed in Table 1.

### Target coverage and dose distribution

All three techniques met the clinical requirements. For PTV-G, IMRT exhibited better homogeneity index (HI) than 3DCRT ( $p = 0.003$ ) and both SmartARC and IMRT exhibited better conformality index (CI) than 3DCRT with same  $p$  value (both  $p = 0.005$ ). There are no HI differences for PTV-G when compared SmartARC with IMRT and 3DCRT ( $p = 0.598$  and  $p = 0.097$  respectively). IMRT had superior CI to SmartArc ( $p = 0.028$ ).

For PTV-C, both SmartARC and IMRT exhibited better CI than 3DCRT with same  $p$  value (both  $p = 0.005$ ). SmartARC had superior CI to IMRT ( $p = 0.005$ ).

### Small bowel and bladder

The mean volumes of small bowel and bladder in this study were  $683.7 \text{ cm}^3$  (ranged from  $406.2$  to  $1488.5 \text{ cm}^3$ ) and  $117.4 \text{ cm}^3$  (ranged from  $50.0$  to  $259.7 \text{ cm}^3$ ), respectively. Compared to the 3DCRT, the IMRT and SmartArc showed significant sparing improvement for almost all the evaluated dosimetric parameters. For the small bowel, there were no significant differences between the IMRT and SmartArc on  $V_{15}$ ,  $V_{40}$ ,  $V_{50}$  and  $D_{\text{mean}}$ . Although the  $V_{30}$  was lower for IMRT than SmartArc, a slightly higher dose for low-dose area ( $< 12 \text{ Gy}$ ) in IMRT was observed (Figure 2C). For the bladder, the IMRT

showed superior dosimetric results to SmartArc on  $V_{30}$ ,  $V_{40}$ , and  $D_{\text{mean}}$ . Again, the IMRT had slight higher dose on the low-dose area and a slight higher  $V_{50}$ .

### Femoral heads

The volume of femoral heads ranged from  $68.8$  to  $121.4 \text{ cm}^3$  with a mean value of  $94.4 \text{ cm}^3$ . Similar to the bladder, the IMRT and SmartArc had superior sparing to the 3DCRT. However, compared to the SmartArc, the IMRT demonstrated statistically significant benefit with lower dose on the femoral heads (all  $p < 0.05$ ). This could be also found in the related DVH (Figure 2E).

### Normal tissue

IMRT had superior normal tissue sparing to 3DCRT for all the values compared. SmartArc also had superior normal tissue sparing to 3DCRT except the  $V_{10}$  and  $V_{20}$ . They were equivalent on the  $V_{10}$  but SmartArc was worse on the  $V_{20}$ . IMRT had better sparing on the  $V_{10}$ ,  $V_{20}$ ,  $V_{30}$ , and  $D_{\text{mean}}$  than SmartArc in the normal tissue and they were equivalent on the  $V_{40}$ . However, the SmartArc had the best advantage of reducing  $V_{50}$ .

## DISCUSSION

This dosimetric study compared the dose variability among the VMAT, IMRT, 3DCRT for the simultaneously integrated boost rectal cancer radiotherapy. A few studies have investigated different treatment techniques (3DCRT, IMRT, VMAT and Proton) for rectal cancer [14, 17, 18, 19]. However, only one study was concerned on the SIB radiotherapy [19].

When comparing SmartArc and IMRT to 3DCRT technique, all the results revealed obvious superiority of the target coverage and OARs sparing. SmartArc and IMRT achieved comparable results in most of the evaluated endpoints on the target. Such as PTV-G, IMRT plans got lower mean dose and better conformity index. However, VMAT plans resulted in better conformality for the PTV-C volume. With regard to OARs sparing, IMRT plans was significantly superior to SmartArc in most of the relevant values for bladder, femoral heads and normal tissue surrounding target volume. But for small bowel, the IMRT and SmartArc were comparable except for  $V_{30}$ . Additionally, IMRT plans produced significant volume sparing from 30 Gy isodose line.

For the rectal radiochemotherapy, acute gastrointestinal toxicity (notably diarrhea) is one of the most common complications. Previous studies have demonstrated a strong dose–volume relationship between the severities of diarrheal toxicity and irradiated small bowel volume at

different dose levels [10–13]. Baglan KL et al. indicated a strong dose–volume relationship existing between the irradiated small bowel volume and acute diarrhea at all dose levels and they constructed a predictive model for acute toxicity [10]. Subsequent studies have confirmed the significance of intermediate dose levels  $V_{15}$ ,  $V_{20}$  and  $V_{25}$  with respect to severe diarrhea [12, 13]. From the cumulative DVH of small bowel in our study, it is clear that IMRT reveals significant lower irradiated volume than SmartArc and 3DCRT in the intermediate dose range

(15–35 Gy). This indicates that IMRT plans will lower the risk of acute toxicity for small bowel after radiochemotherapy.

In summary, our results revealed the IMRT technique as the best technique for current study. Although IMRT and SmartArc achieved the comparable target coverage, IMRT was better in OARs and normal tissue sparing. And obviously, IMRT and SmartArc were superior to 3DCRT in most clinically evaluated endpoints.

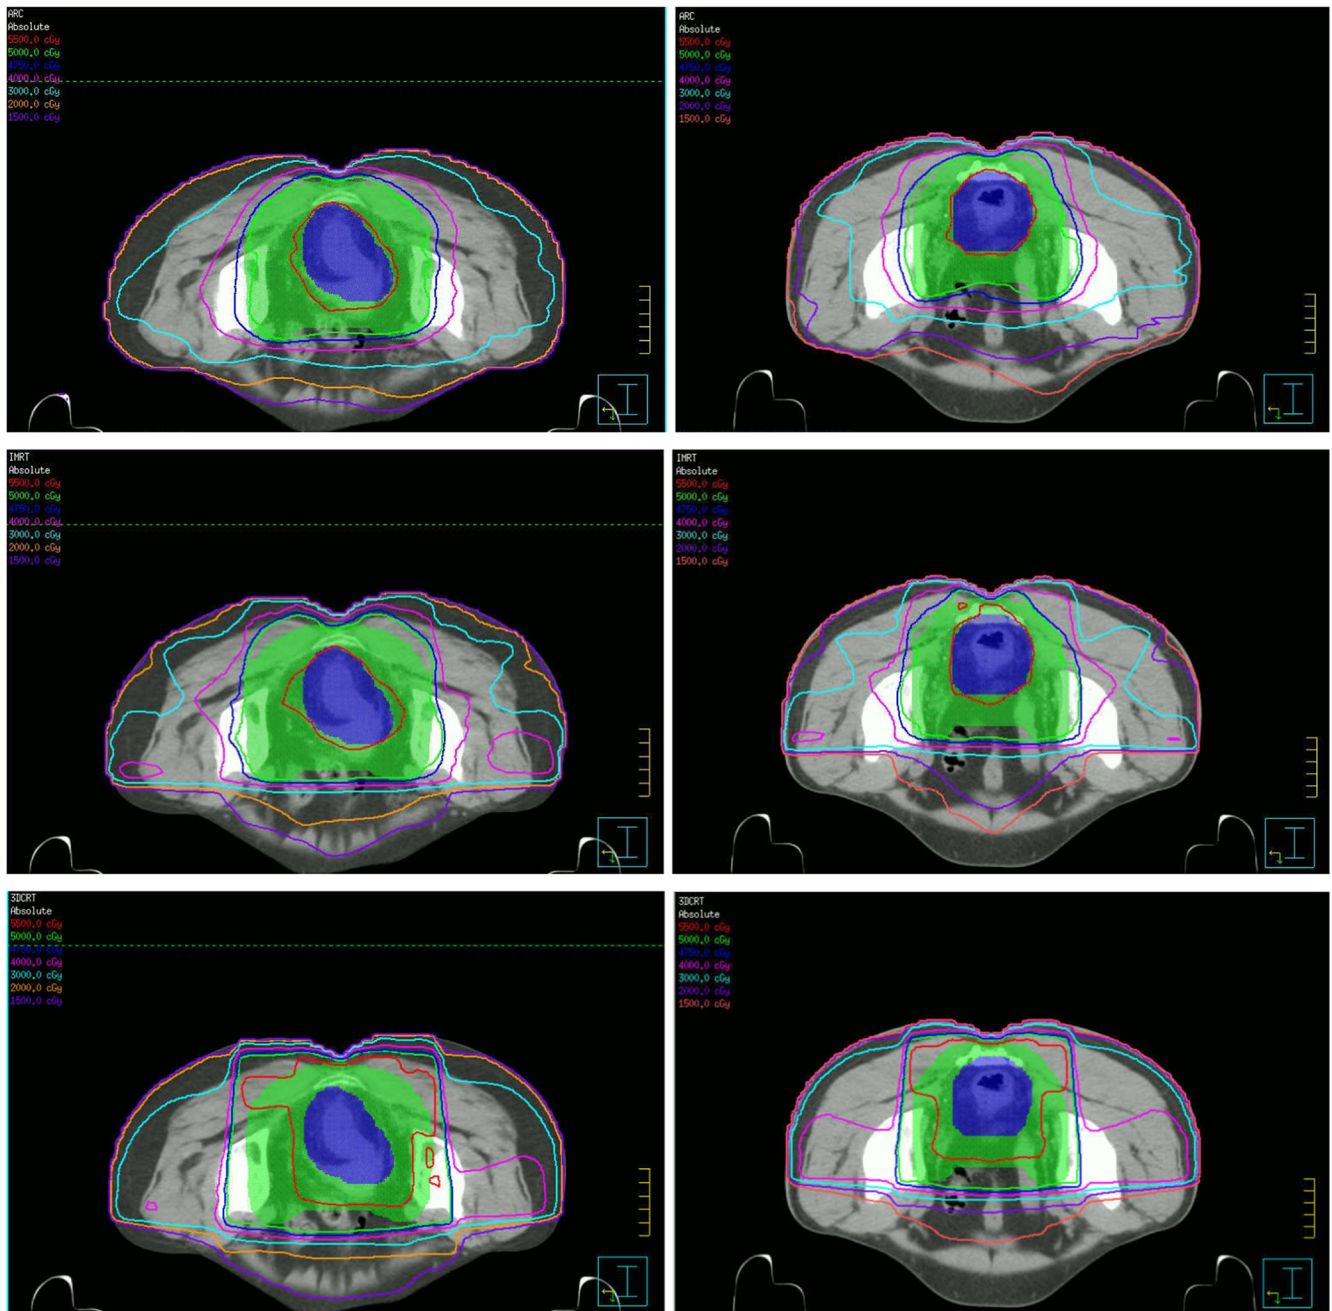

**Figure 1: Dose distributions of three planning techniques for two patients in the axial slices. From up to down are SmartARC, IMRT and 3DCRT respectively.**

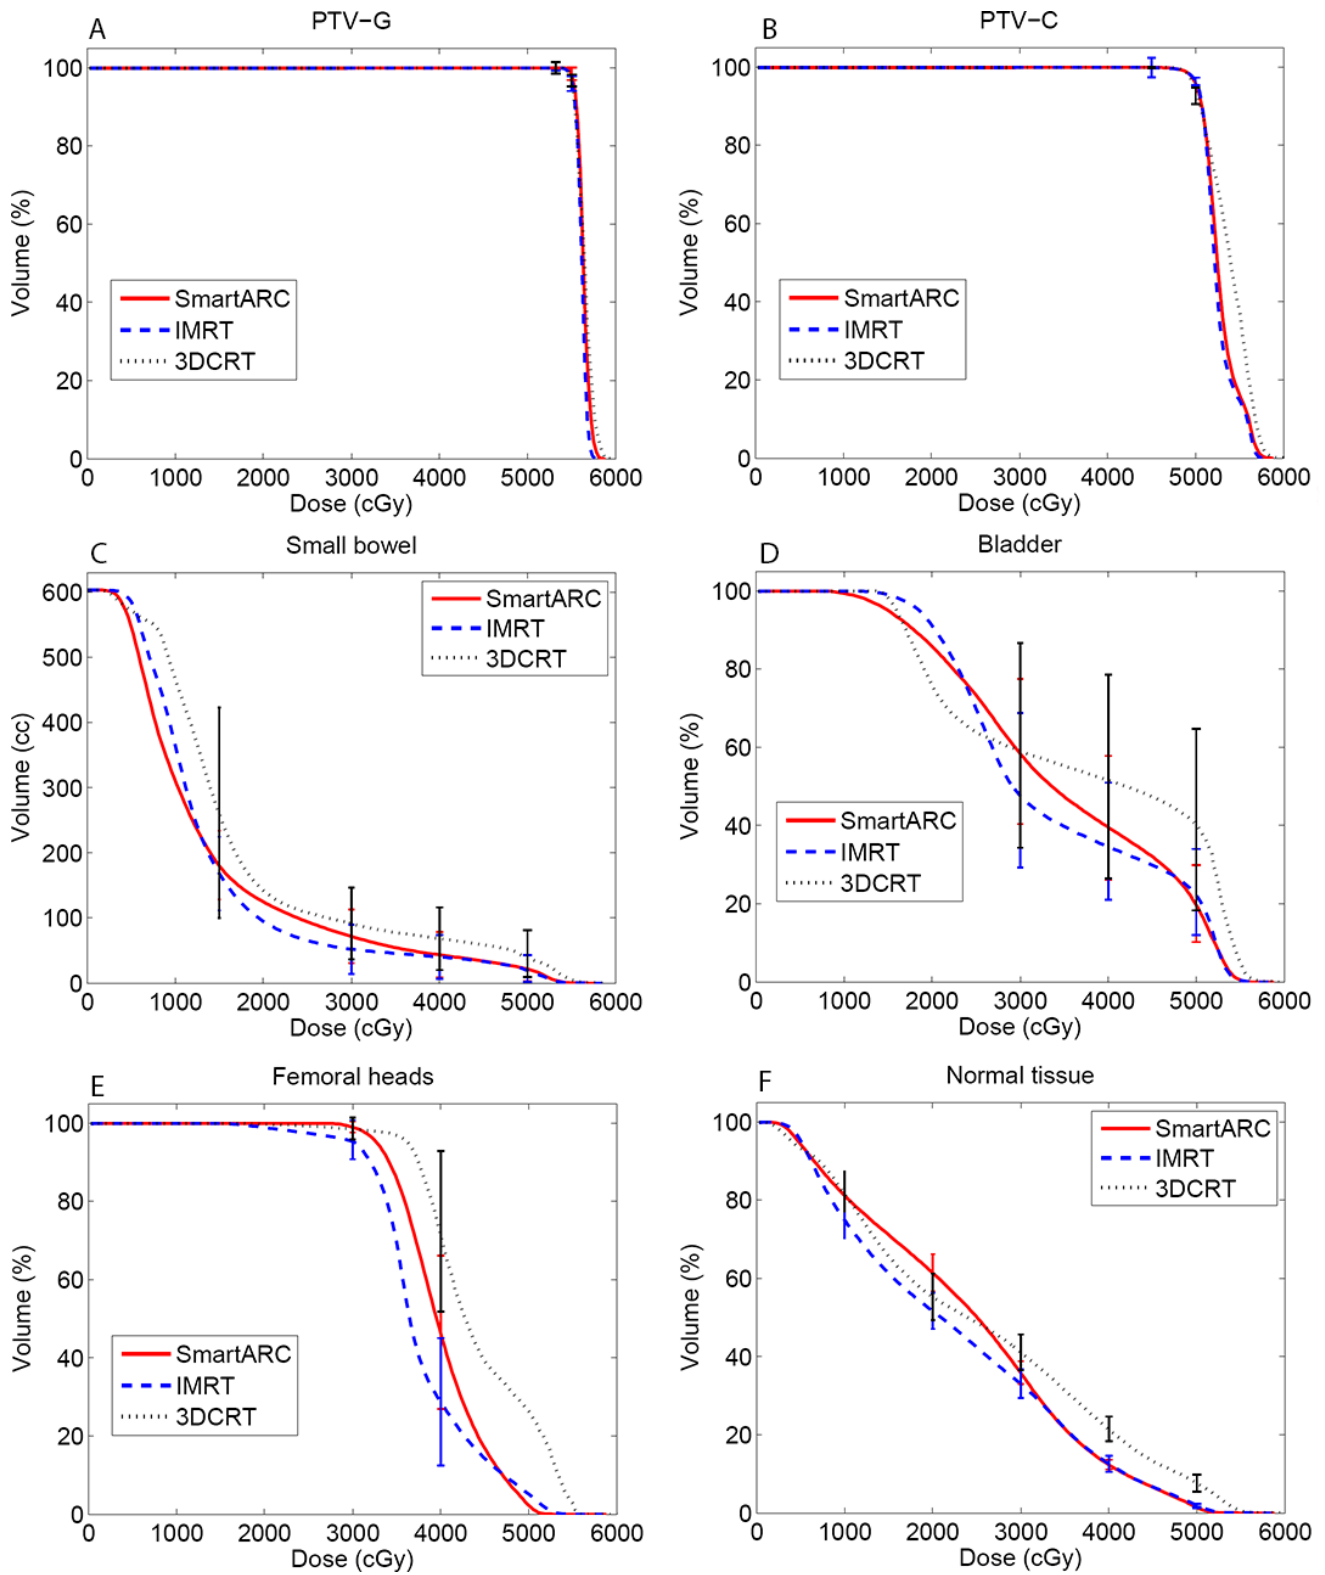

**Figure 2:** Cumulative DVH of the target (A: PTV-G; B: PTV-C), the OARs (C: Small bowel; D: Bladder; E: Femoral heads) and normal tissue (F: Normal tissue) of the three treatment planning techniques.

**Table 1: Dose statistics comparison for planning target volumes and organs at risk**

| Parameter                                                                       | SmartARC        | IMRT            | 3DCRT           | SmartARC vs IMRT | SmartARC vs 3DCRT | IMRT vs 3DCRT |
|---------------------------------------------------------------------------------|-----------------|-----------------|-----------------|------------------|-------------------|---------------|
| <b>PTV-G. Volume (cm<sup>3</sup>): 247.6 ± 54.6 (156.2–340.3)</b>               |                 |                 |                 |                  |                   |               |
| D1% (Gy)                                                                        | 57.4 ± 0.6      | 57.1 ± 0.3      | 58.3 ± 0.5      | <i>n</i>         | 0.005             | 0.005         |
| D99% (Gy)                                                                       | 55 ± 0.3        | 54.8 ± 0.4      | 55.4 ± 0.2      | <i>n</i>         | <i>n</i>          | <i>n</i>      |
| mean (Gy)                                                                       | 56.5 ± 0.6      | 56.1 ± 0.2      | 56.4 ± 0.3      | 0.037*           | <i>n</i>          | 0.013         |
| V95% (%)                                                                        | 100.0 ± 0.1     | 100.3 ± 1.1     | 100.0 ± 0.1     | <i>n</i>         | <i>n</i>          | <i>n</i>      |
| V100% (%)                                                                       | 98.5 ± 1.6      | 96.8 ± 1.9      | 98.9 ± 1.5      | 0.007            | <i>n</i>          | <i>n</i>      |
| HI                                                                              | 0.0 ± 1         | 0.0 ± 0.0       | 0.0 ± 0.0       | <i>n</i>         | <i>n</i>          | 0.003         |
| CI                                                                              | 1.2 ± 0.2       | 1.1 ± 0.1       | 3.1 ± 0.6       | 0.028*           | 0.005             | 0.005         |
| <b>PTV-C. Volume (cm<sup>3</sup>): 1844.8 ± 215.2 (1562.3–2310.8)</b>           |                 |                 |                 |                  |                   |               |
| D99% (Gy)                                                                       | 48.8 ± 4        | 48.7 ± 0.4      | 48.9 ± 0.6      | <i>n</i>         | <i>n</i>          | <i>n</i>      |
| mean (Gy)                                                                       | 52.8 ± 0.3      | 52.6 ± 0.4      | 53.9 ± 0.3      | <i>n</i>         | 0.005             | 0.005         |
| V95% (%)                                                                        | 100.0 ± 0.1     | 100.0 ± 2.5     | 100.0 ± 0.2     | <i>n</i>         | <i>n</i>          | <i>n</i>      |
| V100% (%)                                                                       | 95.0 ± 0.0      | 96.5 ± 1.0      | 94.7 ± 2.1      | <i>n</i>         | <i>n</i>          | <i>n</i>      |
| CI                                                                              | 1.0 ± 0.3       | 1.1 ± 0.2       | 1.4 ± 0.1       | 0.005            | 0.005             | 0.005         |
| <b>Small bowel. Volume (cm<sup>3</sup>): 683.7 ± 330.4 (406.2–1488.5)</b>       |                 |                 |                 |                  |                   |               |
| mean (Gy)                                                                       | 15.2 ± 3.2      | 15.1 ± 3.1      | 19.2 ± 0.6      | <i>n</i>         | 0.005             | 0.005         |
| V15 (cc)                                                                        | 180.9 ± 53.7    | 167.9 ± 56.4    | 261.6 ± 161.5   | <i>n</i>         | 0.047             | 0.013         |
| V30 (cc)                                                                        | 71.6 ± 41.1     | 51.9 ± 37.7     | 91.1 ± 55.4     | 0.005*           | 0.022             | 0.005         |
| V40 (cc)                                                                        | 43.3 ± 35.5     | 40.2 ± 33.8     | 68.4 ± 48.1     | <i>n</i>         | 0.005             | 0.005         |
| V50 (cc)                                                                        | 22.4 ± 20.0     | 22.5 ± 35.8     | 44.9 ± 35.8     | <i>n</i>         | 0.005             | 0.005         |
| <b>Bladder. Volume (cm<sup>3</sup>): 117.4 ± 76.7 (50.0–259.7)</b>              |                 |                 |                 |                  |                   |               |
| mean (Gy)                                                                       | 36.9 ± 5.6      | 36.0 ± 5.3      | 40.0 ± 8.7      | 0.017*           | <i>n</i>          | 0.022         |
| V <sub>30</sub> (%)                                                             | 64.7 ± 18.6     | 54.6 ± 19.8     | 67.3 ± 26.2     | 0.005*           | <i>n</i>          | 0.009         |
| V <sub>40</sub> (%)                                                             | 44.2 ± 15.8     | 38.9 ± 15.0     | 59.2 ± 26.1     | 0.005*           | 0.013             | 0.005         |
| V <sub>50</sub> (%)                                                             | 22.2 ± 9.8      | 25.0 ± 11.0     | 45.7 ± 23.2     | 0.047            | 0.005             | 0.005         |
| <b>Femoral heads. Volume (cm<sup>3</sup>): 94.4 ± 20.2 (68.8–121.4)</b>         |                 |                 |                 |                  |                   |               |
| mean (Gy)                                                                       | 40.4 ± 2.2      | 38.3 ± 2.7      | 44.6 ± 3.4      | 0.005*           | 0.005             | 0.005         |
| V <sub>30</sub> (%)                                                             | 99.1 ± 1.4      | 95.8 ± 5.0      | 98.7 ± 2.8      | 0.012*           | <i>n</i>          | 0.012         |
| V <sub>40</sub> (%)                                                             | 49.3 ± 18.6     | 31.5 ± 16.3     | 71.1 ± 20.5     | 0.005*           | 0.007             | 0.005         |
| <b>Normal tissue. Volume (cm<sup>3</sup>): 9956.4 ± 1877.9 (7308.3–11879.9)</b> |                 |                 |                 |                  |                   |               |
| mean (Gy)                                                                       | 24.5 ± 1.2      | 22.8 ± 1.5      | 25.9 ± 1.9      | 0.005*           | 0.017             | 0.005         |
| V <sub>10</sub> (cc)                                                            | 8119.8 ± 1222.0 | 7979.4 ± 1067.9 | 8155.5 ± 1154.7 | 0.005*           | <i>n</i>          | 0.015         |
| V <sub>20</sub> (cc)                                                            | 6141.0 ± 818.4  | 5154.6 ± 639.4  | 5520.9 ± 645.3  | 0.005*           | 0.007*            | 0.009         |
| V <sub>30</sub> (cc)                                                            | 3574.0 ± 484.8  | 3296.0 ± 371.0  | 4101.4 ± 588.5  | 0.013*           | 0.007             | 0.005         |
| V <sub>40</sub> (cc)                                                            | 1232.7 ± 154.8  | 1230.0 ± 103.0  | 2131.9 ± 458.8  | <i>n</i>         | 0.005             | 0.005         |
| V <sub>50</sub> (cc)                                                            | 123.5 ± 24.9    | 199.3 ± 28.2    | 763.4 ± 150.8   | 0.005            | 0.005             | 0.005         |

Dosimetric comparison of three treatment planning techniques. *p* value normally displayed means the former is better than the latter. *p* value displayed with a star superscript means the latter is better than the former. *p* value of *n* means no statistically significant.

## MATERIALS AND METHODS

### Patient selection and imaging

Ten consecutive patients of locally advanced rectal cancer with simultaneous integrated boost treated with preoperative radiochemotherapy at our department were involved in this study. All ten patients had T3 stage with N0 (1 patient) and N1–2 (9 patients). None of them had evidence of distant metastasis (M0). The median age was 56.9 years (ranged from 32 to 65). All patients were immobilized, simulated and treated in the prone position using a carbon-fiber belly board apparatus to achieve abdominal contents avoidance. The planning CT was scanned in a big core CT (Philips Brilliance CT) with slice thickness of 5 mm. No specific bladder filling or empty instructions were given to patients. All procedures were passed through the ethical standards of our institute.

### Target delineation and treatment planning

Target volumes and organs at risk were delineated on the Pinnacle<sup>3</sup> treatment planning system (TPS, Philips Medical Systems, Pinnacle v9.0, Milpitas, CA). The gross tumor volume (GTV) was determined by a combination of findings on physical exam, CT, MRI, and/or PET-CT. The planning target volume PTV-G was GTV plus a 12 mm uniform margin. The clinical target volume (CTV) included the GTV, the internal iliac, pre-sacral and peri-rectal nodal groups, the external iliac nodal region (if lesions extended into gynecologic/genitourinary structures or positive external iliac lymph nodes) and the inguinal nodal region (if lesions extended to the anal verge, peri-anal skin or positive inguinal nodes). The PTV-C was generated with a 8–10 mm asymmetrical margin around the CTV. A 8-mm margin was used in areas where the lesions were close to the small bowel, bladder and femoral heads, while a 10-mm margin was used elsewhere. The small bowel, bladder and femoral heads were defined as organs at risk.

The prescribed doses were 50 Gy to the PTV-C volume and 56 Gy simultaneous to the PTV-G volume in 25 treatment fractions. The plans were optimized to meet the following criteria: less than 50% of bladder volume received 40Gy and no volume should receive 60 Gy; less than 20 cc of small bowel received 50 Gy and less than 100 cc received 40 Gy; less than 25% of femoral heads received 45 Gy.

All patients were treated with IMRT technique on the Trilogy linac with 6 MV photons and Millennium 120–leaf MLC (Varian Medical Systems, Palo Alto, CA).

IMRT plans were created in the Pinnacle<sup>3</sup> TPS using the direct machine parameter optimization (DMPO) with a total segment of 50. For the dosimetric comparison purpose, a 3DCRT and a VMAT plan were additionally created to each patient and compared to the actually delivered IMRT plan. During the 3DCRT planning, beam

angles were both set to 0°, 90° and 270° to the PTV-C and PTV-G with different beam shapes. This beam arrangement helped to avoid the direct irradiation on the small bowel. The 6 MV was used for beam 0° and 15 MV for the others. Beam weightings and wedges (40° or 45°) were manually adjusted for each patient. VMAT plans were designed using SmartArc planning module. Dual 6-MV partial arcs were used in our planning (clockwise from 220° to 140°CW and counterclockwise from 140° to 220°) to avoid beams incidence from the front of patient abdomen. The final dose calculation was performed using a 4-degree spacing with a total of 142 control points. Collimator angle was set to 15° to minimize the tongue-and-groove effect. The dose rate of Varian Trilogy varied range from 0  $\mu$ /min to a maximum of 600  $\mu$ /min.

### Dosimetric comparisons and statistical analysis

Dosimetric evaluation of all plans was performed using dose volume histogram (DVH). For target coverage, the mean dose ( $D_{\text{mean}}$ ), D1% (dose to 1% of the volume) and  $D_{99\%}$  (dose to 99% of the volume),  $V_{95\%}$  (volume of the target receiving at least 95% of the prescribed dose) and V100% to the PTV-G and PTV-C were investigated. The homogeneity of the plans was measured in terms of the homogeneity index, which was expressed as  $(D_{5\%} - D_{95\%})/\text{prescribed dose}$ . The conformality of the plans was also evaluated with a conformality index defined as the ratio of the target volume receiving 95% of the prescribed dose divided by the total volume receiving that dose level.

Organs at risk were evaluated in terms of the  $D_{\text{mean}}$  and volumes or percent of volumes receiving different dose level ( $V_x$ ,  $x$  = the interested dose level). For clarity, the  $V_x$  and  $V_x$  represented the absolute and relative volumes, respectively. The absolute volumes of V15, V30, V40 and V50 for small bowel and  $V_{10}$ ,  $V_{20}$ ,  $V_{30}$ ,  $V_{40}$  and  $V_{50}$  for normal tissue were reported. The percentages of total volume of  $V_{30}$ ,  $V_{40}$  and  $V_{50}$  for bladder and  $V_{30}$  and  $V_{40}$  for femoral heads were also investigated. The normal tissue was defined as the whole body excludes the PTV-C.

For statistical analysis, all dosimetric results from different irradiation techniques were compared with each other. The paired, two-tailed Wilcoxon signed-rank test was applied. Results were considered statistically significant with  $p < 0.05$ .

### GRANT SUPPORT

No grant support this research.

### CONFLICTS OF INTEREST

No conflicts of interest from all participating authors.

## REFERENCES

1. Sauer R, Becker H, Hohenberger W, Rödel C, Wittekind C, Fietkau R, Martus P, Tschmelitsch J, Hager E, Hess CF, Karstens JH, Liersch T, Schmidberger H, et al. Preoperative versus postoperative chemoradiotherapy for rectal cancer. *N. Engl J Med.* 2004; 351:1731–1740. doi: 10.1056/NEJMoa040694.
2. Sauer R, Fietkau R, Wittekind C, Rödel C, Martus P, Hohenberger W, Tschmelitsch J, Sabitzer H, Karstens JH, Becker H, Hess C, Raab R. Adjuvant vs. neoadjuvant radiochemotherapy for locally advanced rectal cancer: the German trial CAO/ARO/AIO-94. *Colorectal Dis.* 2003; 5:406–415. doi: 10.1046/j.1463-1318.2003.00509.x.
3. Jemal A, Siegel R, Ward E, Hao Y, Xu J, Thun MJ. Cancer statistics. *CA Cancer J Clin.* 2009; 59:225–49. doi: 10.3322/caac.20006.
4. Midgley R, Kerr D. Colorectal cancer. *Lancet.* 1999; 353:391–399.
5. Nagtegaal ID, Gosens MJ, Marijnen CA, Rutten HJ, Van de Velde CJ, van Krieken JH. Combinations of tumor and treatment parameters are more discriminative for prognosis than the present TNM system in rectal cancer. *J. Clin. Oncol.* 2007; 25:1647–1650. doi: 10.1200/JCO.2005.05.4825.
6. Crane CH, Janjan NA, Mason K, Milas L. Preoperative chemoradiation for locally advanced rectal cancer: emerging treatment strategies. *Oncology.* 2002; 16, 39–44.
7. Rodel C, Sauer R. Integration of novel agents into combined-modality treatment for rectal cancer patients. *Strahlenther Onkol.* 2007; 183:227–35.
8. Roh MS, Colangelo LH, O'Connell MJ, Yothers G, Deutsch M, Allegra CJ, Kahlenberg MS, Baez-Diaz L, Ursiny CS, Petrelli NJ, Wolmark N. Preoperative multimodality therapy improves disease-free survival in patients with carcinoma of the rectum: NSABP R-03. *J. Clin. Oncol.* 2009; 27: 5124–5130. doi: 10.1200/JCO.2009.22.0467.
9. Kollmorgen CF, Meagher AP, Wolff BG, Pemberton JH, Martenson JA, Illstrup DM. The long-term effect of adjuvant postoperative chemoradiotherapy for rectal carcinoma on bowel function. *Ann. Surg.* 1994; 220: 676–682.
10. Baglan KL, Frazier RC, Yan D, Huang RR, Martinez AA, Robertson JM. The dose-volume relationship of acute small bowel toxicity from concurrent 5-FU-based chemotherapy and radiation therapy for rectal cancer. *Int. J. Radiat. Oncol. Biol. Phys.* 2002; 52:176–183.
11. Tho LM, Glegg M, Paterson J, Yap C, MacLeod A, McCabe M, McDonald AC. Acute small bowel toxicity and preoperative chemoradiotherapy for rectal cancer: investigating dose-volume relationships and role for inverse planning. *Int. J. Radiat. Oncol. Biol. Phys.* 2006; 66: 505–513.
12. Robertson JM, Lockman D, Yan D, Wallace M. The dose-volume relationship of small bowel irradiation and acute grade 3 diarrhea during chemoradiotherapy for rectal cancer. *Int. J. Radiat. Oncol. Biol. Phys.* 2008; 70:413–418.
13. Wolff HA, Wagner DM, Conradi LC, Hennies S, Ghadimi M, Hess CF, Christiansen H. Irradiation with protons for the individualized treatment of patients with locally advanced rectal cancer: A planning study with clinical implications. *Radiotherapy and Oncology.* 2012; 102:30–37. doi: 10.1016/j.radonc.2011.10.018.
14. Duthoy W, De Gersem W, Vergote K, Boterberg T, Derie C, Smeets P, De Wagter C, De Neve W. Clinical implementation of intensity-modulated arc therapy (IMAT) for rectal cancer. *Int. J. Radiat. Oncol. Biol. Phys.* 2004; 60: 794–806.
15. Guerrero Urbano MT, Henrys AJ, Adams EJ, Norman AR, Bedford JL, Harrington KJ, Nutting CM, Dearnaley DP, Tait DM. Intensity-modulated radiotherapy in patients with locally advanced rectal cancer reduces volume of bowel treated to high dose levels. *Int. J. Radiat. Oncol. Biol. Phys.* 2006; 65:907–916.
16. Arbea L, Ramos LI, Martínez-Monge R, Moreno M, Aristu J. Intensity-modulated radiation therapy (IMRT) vs. 3D conformal radiotherapy (3DCRT) in locally advanced rectal cancer (LARC): dosimetric comparison and clinical implications. *Radiation Oncology.* 2010; 5:17. doi: 10.1186/1748-717X-5-17.
17. Mok H, Crane CH, Palmer MB, Briere TM, Beddar S, Delclos ME, Krishnan S, Das P. Intensity modulated radiation therapy (IMRT): differences in target volumes and improvement in clinically relevant doses to small bowel in rectal carcinoma. *Radiation Oncology.* 2011; 6:63.
18. Richetti A, Fogliata A, Clivio A, Nicolini G, Pesce G, Salati E, Vanetti E, Cozzi L. Neo-adjuvant chemo-radiation of rectal cancer with Volumetric Modulated Arc Therapy: summary of technical and dosimetric features and early clinical experience. *Radiation Oncology.* 2010; 5:14. doi:10.1186/1748-717X-5-14.
19. Cilla S, Caravatta L, Picardi V, Sabatino D, Macchia G, Digesù C, Deodato F, Massacesi M, De Spirito M, Piermattei A, Morganti AG. Volumetric Modulated Arc Therapy with Simultaneous Integrated Boost for Locally Advanced Rectal Cancer. *Clinical Oncology.* 2012; 24: 261–268. doi: 10.1016/j.clon.2011.07.001.
